# Supplementary material
Source: publisher figshare collection journal article supplement (https://tandf.figshare.com/ndownloader/files/17448815)
Supplement: Supplementary file 1 [file 17448815]

Supporting information for

Characterization and Demonstration of a Black Carbon Aerosol Mimic for Instrument Evaluation

Christopher D. Zangmeister1, Courtney Grimes2, Russell R. Dickerson3, James G. Radney1

1. Material Measurement Laboratory, National Institute of Standards and Technology,
Gaithersburg, Maryland, 20899, USA

2. Department of Chemistry, University of Maryland, College Park, Maryland, 20742, USA

3. Department of Atmospheric and Oceanic Science, University of Maryland, College Park, Maryland, 20742, USA


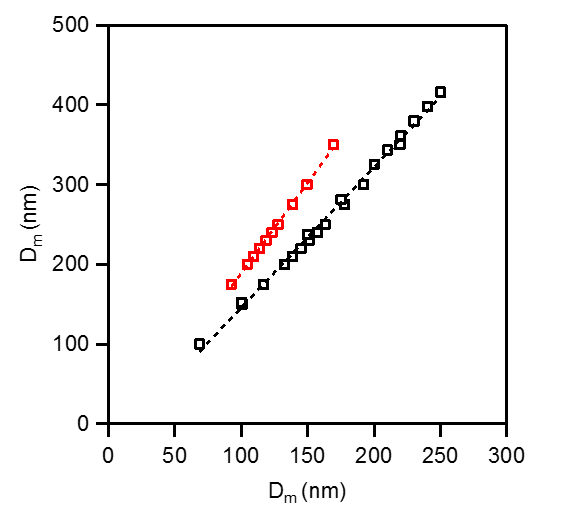


**Figure S1.** *D*m of q = +2 (black) and +3 (red) as a function of *D*m for q = +1 for *D*m selected CB aerosol. Dashed lines represent linear best fit of each dataset.


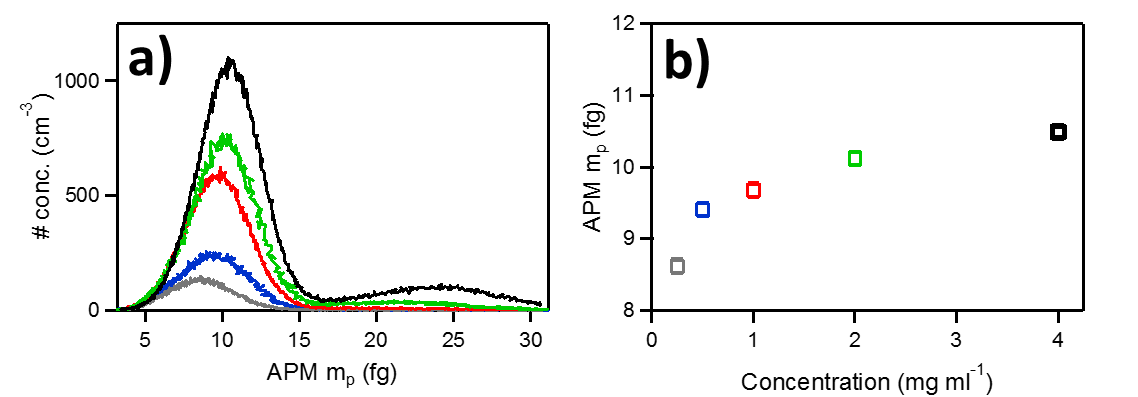


**Figure S2.** a) Aerosol concentration as a function of aerosol mass (mp) for *D*m = 300 nm CB 0.25 (grey), 0.50 (blue) 1.0 (red), 2.0 (green), 4.0 (black) mg CB mL-1 aqueous CB suspensions. b) Peak mp for *D*m = 300 nm CB aerosol as a function of CM suspension concentration.

**Table S1.**

| *D*m  (nm) | *MEC* λ = 405 nm  (m2 g-1) | *MEC* λ = 660 nm  (m2 g-1) |
| --- | --- | --- |
| 150 | 13.45 ± 0.86 | 5.79 ± 0.28 |
| 200 | 14.02 ± 0.76 | 6.97 ± 0.43 |
| 250 | 13.84 ± 0.89 | 7.99 ± 0.95 |
| 300 | 13.14 ± 0.91 | 8.33 ± 0.78 |
| 350 | 12.27 ± 0.86 | 8.55 ± 0.96 |
| 400 | 11.83 ± 0.97 | 8.16 ± 1.02 |
| 450 | 11.17 ± 0.81 | 8.64 ± 0.57 |
| 500 | 10.65 ± 0.77 | 8.54 ± 0.62 |
